# Supplementary material
Source: Springer Nature journal article supplement (https://www.springermedizin.de/resource/supplementary/12974_2011_488_MOESM3_ESM.pdf/9601402)

**A***Body Weight*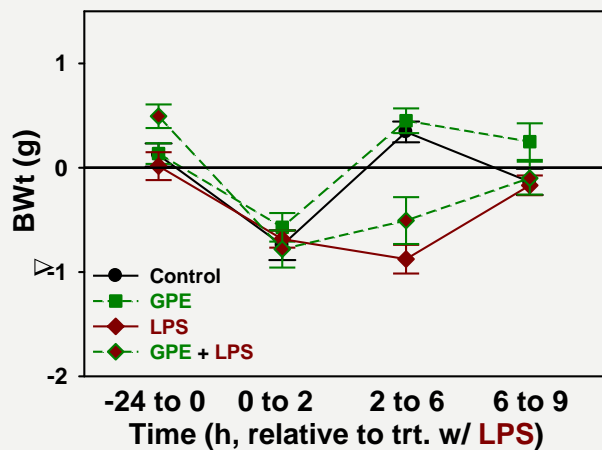**B***Food Intake*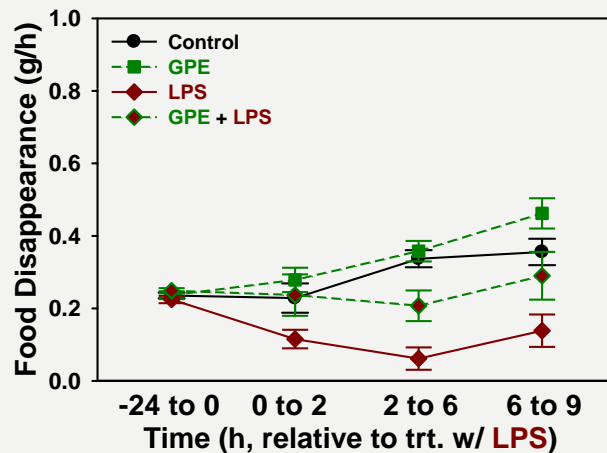**C***Exploration of a Novel Juvenile*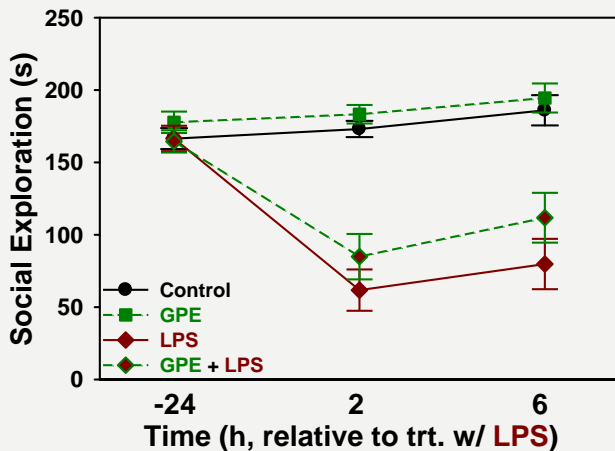**D***Tail Suspension Test*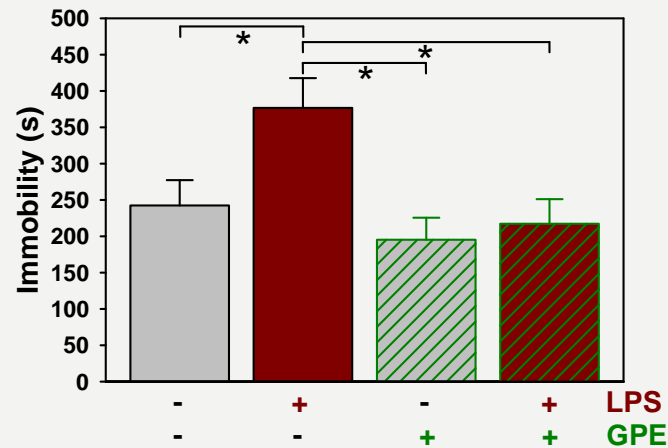

Supplement: MOESM3 [file 9601402]
